# Supplementary material for: Pancreatic β cell identity requires continual repression of non–β cell programs
Source: JCI journal article supplement (doi:10.1172/jci88017), 2016-12-11
Supplement: sd1 [file 1]

**Figure S1. Development of diabetes is not influenced by changes in body weight or insulin sensitivity .** (A-B) No significant weight differences were found in Nkx2.2  $\Delta$ Beta vs. littermate control females (n=5-20) and males (n=3-12), by 2-tailed Student's t test. (C-D) Female Nkx2.2 $\Delta$ Beta mice are glucose intolerant beginning at 3 weeks of age (n=6-23) and become overtly diabetic by 11 weeks of age (n=7-33). \* $p \leq 0.05$ ; \*\* $p \leq 0.01$ ; \*\*\* $p \leq 0.001$ , by 2-tailed Student's t test. (E) Insulin tolerance tests demonstrate that the Nkx2.2 $\Delta$ Beta mice do not have insulin sensitivity defects compared to controls at 3 weeks of age. (n=3-5) , by 2-tailed Student's t test. (F) Glucose stimulated insulin secretion assays show normal insulin secretion levels in Nkx2.2 $\Delta$ Beta mice at 4 weeks of

age compared to controls (n=3). (G) Glucose stimulated insulin secretion assay exhibits an impaired basal insulin response in female Nkx2.2ΔBeta mice compared to controls at 17 months of age (n=3).\*\*p ≤0.01; by 2-tailed Student's t test.

**Figure S2. Loss of important beta cell protein expression in Nkx2.2ΔBeta islets correlated with their decreased RNA expression.** (A-D) Representative images of immunostained islet sections from 4 week old (A,B) and 12 week old (C,D) Nkx2.2ΔBeta mice (B,D) and their littermate controls (A,C). Dapi (grey) marks the nuclei and Glut2 (green) is on the cell membrane. Glut2 expression is decreased at 4 weeks of age and becomes almost undetectable at 12 weeks. (E-F) Representative images of immunostained islet sections from 4 week old Nkx2.2ΔBeta mice (E) and a littermate controls (F). Insulin (blue), glucagon, somatostatin and pancreatic polypeptide, combined (red), and Nkx6.1 (green). F' and F'' show higher magnification images of cells that are insulin+, express other hormones and are Nkx6.1 negative. (G-J) Immunostained islet sections from P0 (G,H) and 2 week old (I,J) Nkx2.2ΔBeta mice (H,J) and their littermate controls (G,I). Dapi (blue) marks the nuclei, Insulin (red) and Ghrelin (green). Ghrelin expressing cells are rare and the numbers decrease with age both in the control and Nkx2.2ΔBeta mice. (K) Elevated plasma somatostatin levels are observed 30 min after glucose stimulation by intraperitoneal injection in Nkx2.2ΔBeta 4 week old mice compared to control mice (n=5).\*p≤0.05, by 2-tailed Student's t test.

**Figure S3. Nkx2.2 activates and represses an equal amount of targets preferentially through active and poised enhancer binding.** (A) Comparative analysis of ChIP-Seq

data from MIN6 cells with RNA-Seq data from Nkx2.2 $\Delta$ Beta compared to control islets demonstrates that Nkx2.2 represses and activates relatively equal numbers of direct targets regulated by Nkx2.2. **(B)** Chromatin state of regions bound by Nkx2.2 shows preferential binding to active enhancers (H3k427ac+/H3k4me+) and poised enhancers (H3k4me+). Repressed enhancers (H3k4me+/H3k27me3+) constitute a minor proportion. ChIP-Seq analysis done using Nkx2.2 binding peaks present in all triplicate samples.

**Figure S4. Nx2.2 activates beta cell genes and represses non beta cell islet genes during adulthood.** **(A)** qRT-PCR analysis from Nkx2.2 $\Delta$ Adult Beta and control mice present with gene expression changes at 5 wks after the last tamoxifen injection that continue to exacerbate 6-7months after the last tamoxifen injection. \* $p \leq 0.05$ ; \*\* $p \leq 0.01$ ; \*\*\* $p \leq 0.001$ , by 2-tailed Student's t test.

A

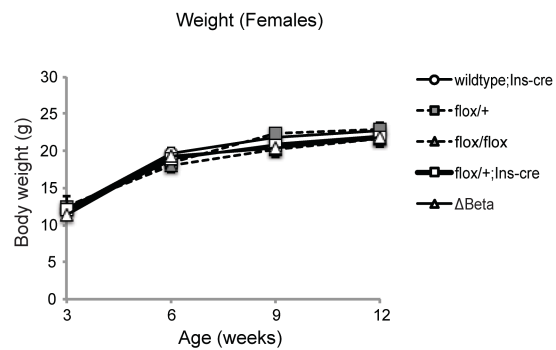

B

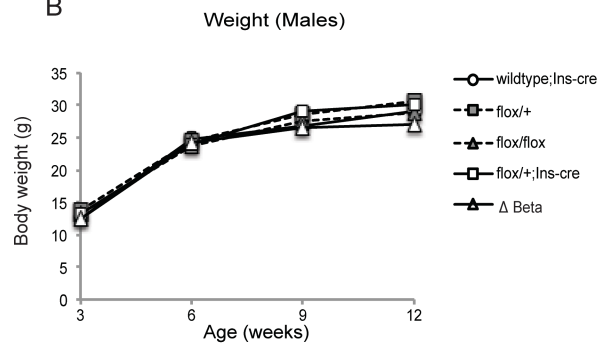

C

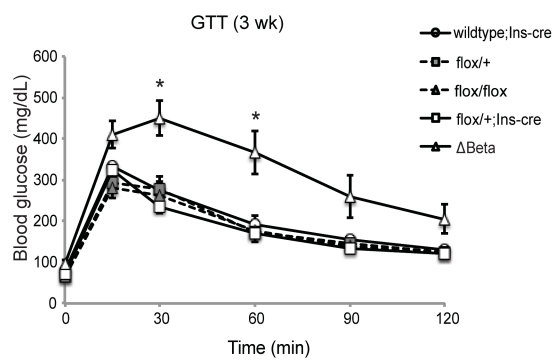

D

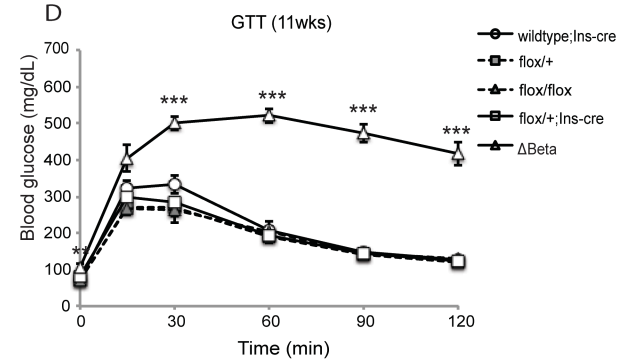

E

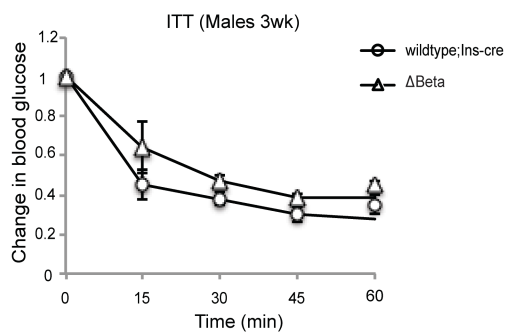

F

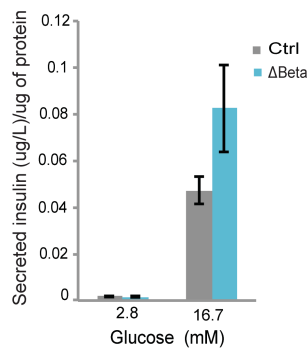

G

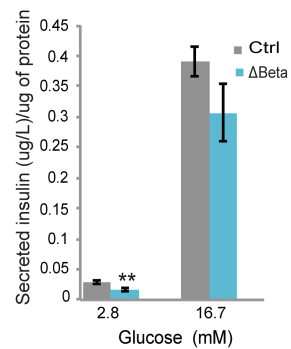

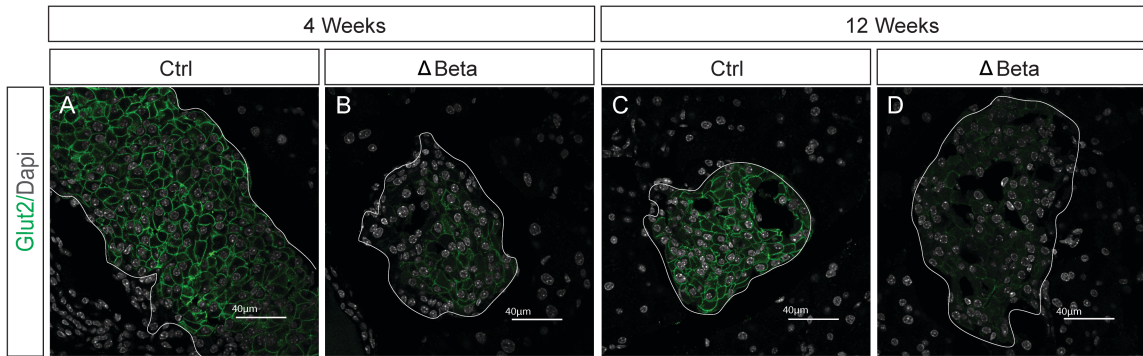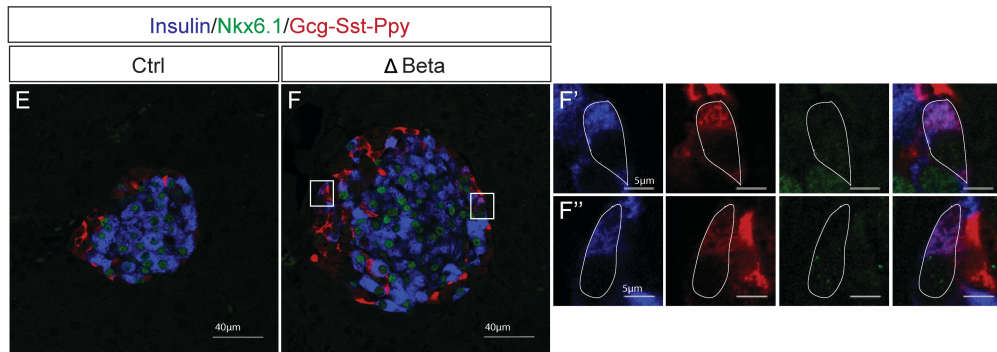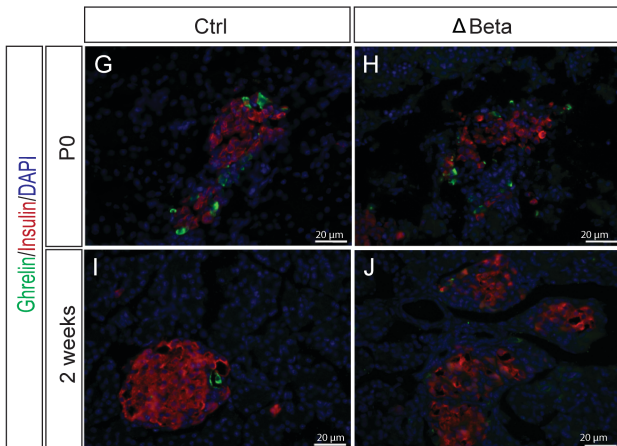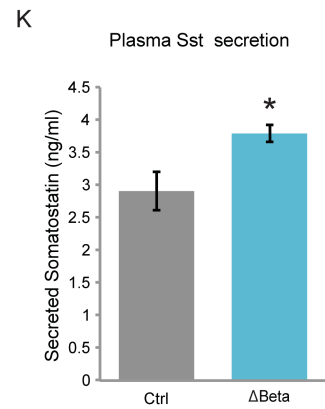

A

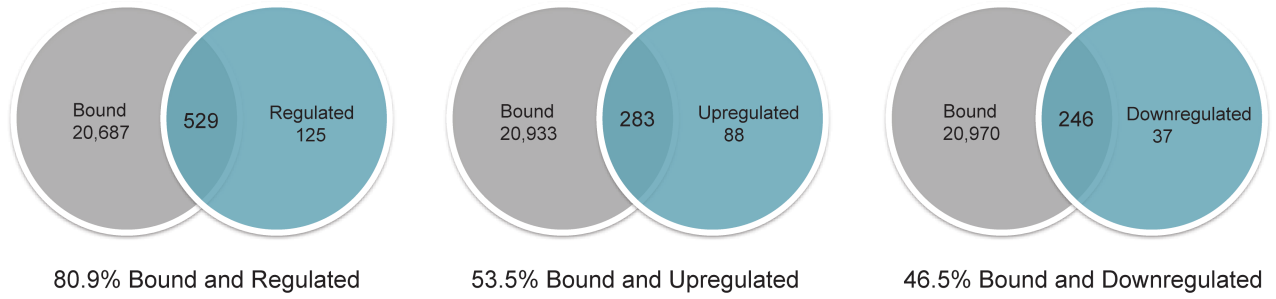

B Chromatin State of regions bound by Nkx2.2

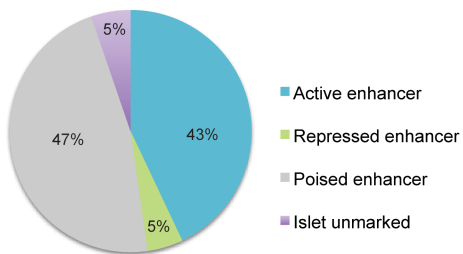

A

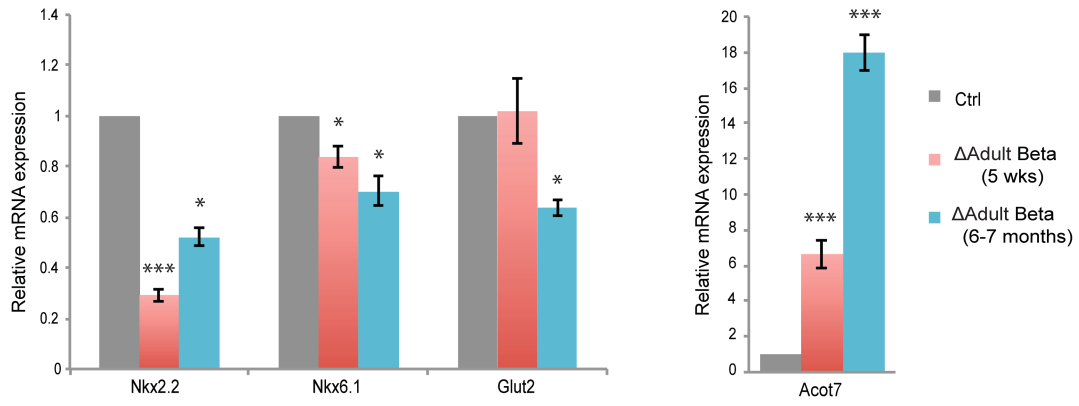

Table S4. List of primary antibodies used in western blot analysis and immunohistochemistry

| <b>Primary Antibodies</b> |             |                 |                               |                    |
|---------------------------|-------------|-----------------|-------------------------------|--------------------|
| <i>Antigen</i>            | <i>Host</i> | <i>Dilution</i> | <i>Source</i>                 | <i>Catalogue #</i> |
| Glucagon                  | Goat        | 1:200           | Santa Cruz                    | sc-7780            |
| Insulin                   | Guinea Pig  | 1:1000          | Dako                          | A0564              |
| Nkx2.2                    | Rabbit      | 1:200           | Sigma                         | hpa003468          |
| Pancreatic Polypeptide    | Goat        | 1:150           | Sigma                         | SAB2500747         |
| RFP                       | Rabbit      | 1:1000          | Rockland<br>Immunochemicals   | 600-401-379        |
| Somatostatin              | Rat         | 1:500           | Abcam                         | ab30788            |
| Cleaved Caspase 3         | Rabbit      | 1:500           | Cell Signaling                | 9661               |
| $\alpha$ -Ghrelin         | Goat        | 1:800           | Santa Cruz<br>Biotechnologies | sc10368            |

Table S5. List of secondary antibodies used in western blot analysis and immunohistochemistry.

| <b>Secondary Antibodies</b> |                           |                        |                           |
|-----------------------------|---------------------------|------------------------|---------------------------|
| <i><b>Antigen</b></i>       | <i><b>Conjugation</b></i> | <i><b>Dilution</b></i> | <i><b>Source</b></i>      |
| Guinea<br>Pig/Rabbit/Goat   | Alexa-488                 | 1:500                  | Jackson<br>ImmunoResearch |
| Rabbit                      | Cy3                       | 1:500                  | Jackson<br>ImmunoResearch |
| Goat/ Guinea Pig/ Rat       | Alexa-647                 | 1:500                  | Jackson<br>ImmunoResearch |
| Rabbit                      | HRP                       | 1:10,000               | Jackson<br>ImmunoResearch |

Table S6. List of primer sequences, probes and AODs used for qRT-PCR analysis in mouse samples

| <b>Gene</b>    | <b>AOD</b>    |
|----------------|---------------|
| Insulin 2      | Mm00731595_gh |
| Slc2a2         | Mm00446229_m1 |
| Nkx6.1         | Mm00454962_m1 |
| Somatostatin   | Mm00436671_m1 |
| Insulin 1      | Mm01950294_s1 |
| Chromogranin A | Mm00514341_m1 |
| Acot7          | Mm00460107_m1 |

| <b>Gene</b> | <b>Sybr green FWD</b> | <b>Sybr green REV</b> |
|-------------|-----------------------|-----------------------|
| Hhex        | TCAGAATCGCCGAGCTAAAT  | CTGTCCAACGCATCCTTTT   |

| <b>Gene</b>   | <b>Probe</b>             | <b>FWD</b>            | <b>REV</b>                  |
|---------------|--------------------------|-----------------------|-----------------------------|
| Nkx2.2        | CCATTGACTCTGCCCCATCGCTCT | CCTCCCCGAGTGGCAGAT    | GAGTTCTATCCTCTCCAAAAGTTCAAA |
| Cyclophilin B | TGGTACGGAAGGTGGAG        | GCAAAGTTCTAGAGGGCAGGA | CCCGGCTGTCTGTCTGGT          |

Table S7. List of primer sequences and AODs used for qRT-PCR analysis in human samples

| <b>Gene</b> |  | <b>AOD</b>    |
|-------------|--|---------------|
| NKX2.2      |  | Hs00159616_m1 |

  

| <b>Gene</b> | <b>Sybr green FWD</b> | <b>Sybr green REV</b> |
|-------------|-----------------------|-----------------------|
| 36B4        | GGCGACCTGGAAGTCCAAC   | CCATCAGCACCCACAGCCTTC |
